# Supplementary material
Source: publisher figshare collection journal article supplement (https://brill.figshare.com/ndownloader/files/13726094)
Supplement: Supplementary file 1 [file 13726094]

# Parma

**Biblioteca Palatina**

# 293 (Fondo Palatina) xv

[Ad Her] trans/para-ital* (Guidotto [‘ghuidotto’] da Bologna)

**Parma**

**Biblioteca Palatina**

**2323 (Fondo Parmense) xiv**

Ad Her E

**Parma**

**Biblioteca Palatina**

**2499 (Fondo Parmense) xiv**

Ad Her

[Ad Her] s-gl (esp. on early folios; several hh)

**Parma**

**Biblioteca Palatina**

**2796 (Fondo Parmense) xiv [actually, looks Carolingian; I would say ix-x, probably the latter)**

[Ad Her] ta

Ad Her

[Ad Her] s-gl (**xi-xii, xiv-xv**)

[Ad Her] ex E (Marbod; added in a xiii h [?] in lower margins fols 25v-30v, between books V and VI of the Ad Her, and also on some [sliced off] upper margins)

**Pavia**

# Biblioteca Universitaria

**437 xv (1472)**

Ad Her

[Ad Her] s-gl (various hh, inc. ‘Rethorica ut commentator Alanus diffinit est preceptio que certam rationem viamque dicendi demonstrat. Dicitur secundum Gasparinum [….] id est locutio quia scientia est de elocutione …’)

**Pavia**

**Biblioteca Universitaria**

**441 Fondo Aldini xv**

[Ad Her] trans/para ital* E (on memory: ‘mo passiamo al texoro de le cose trovate et de tutte le parte de la Rectorica custodevele memoria….’)

[De inv] acc ital* (?‘dice tullio nel prologo della rethorica…’)

**Perugia**

**Biblioteca Comunale Augusta**

**237 (D.55) xiv**

[Ad Her] comm (Alanus)

## Perugia

**Biblioteca Comunale Augusta**

**247 (D.65) xiv-xvi**

Ad Her cn (**xv**? fols 32r-v, on Ad Her 1.1-2 ‘In nomine Domini, amen. *Etsi negociis*: appellative liber is ‘Rethorica Ciceronis’ hiique errant qui novam aut veterem rethoricam esse dicunt…’; with ‘ars oratoria Jacobi Publ. Florentini’ ‘con molte postille d’altra mano’ [Mazzatinti 5 p.106])

**Perugia**

**Biblioteca Comunale Augusta**

**428 (G.17) xv**

Ad Her incompl

[Ad Her incompl ] s-gl (mentioning Victorinus, Pro Roscio Comoedo, Fortunatianus…)

**Perugia**

**Biblioteca Comunale Augusta**

**524 (H.8) xiv**

Ad Her

[Ad Her] s-gl (in a non scribal h)

**Perugia**

**Biblioteca Comunale Augusta**

**584 (H.70) xv (1440)**

Ad Her

[Ad Her] mi/s-gl (contemporary, marg and IL, in various hh, heavy on first few folios, sporadic thereafter; inc. [?] ‘solent in omni inicio explicandarum rerum ac librorum primo illa dici atque percontari que ad cognitionem causarum videntur pertinere ut non artis solum de qua tractatur sed etiam confecte operis rationem intelligamus. … postquam Cicero posuit superius prohemium in quo fecit auditorem benivolum, docilem et attentum et posuit suam intentionem et causas intentionis et modum et ordinem procedendi, hic ponit tractatum in quo artem rhetoricam docet et tractat. Sed quoniam tractare arterm rhetoricam est duplex scilicet intrinsecus et extrinsecus…’)

**Perugia**

**Biblioteca Comunale Augusta**

**651 (I.46) xv**

Ad Her

[Ad Her] s-gl (later)

De inv

[De inv] s-gl (later)

**Perugia**

**Biblioteca Comunale Augusta**

**730 (I.124) xv (1466)**

[Ad Her] comm (Guarino da Verona)

# Pesaro

**Biblioteca Oliveriana**

**1646 xv**

Ad Her (IRHT; Mazzatinti 48.185, however, gives: xvii, Ad Her E [from all 4 books])

**Piacenza**

# Biblioteca Comunale Passerini-Landi

**72 (Land.120) xiv** (letter from the Director, Dott. Carlo Emanuele Manfredi dated 21/8/1986: ‘sono molto mortificato nel doverLa informare che la nostra biblioteca, attualmente chiusa al pubblico per inagibilità dei locali e in attesa di trasferimento in altra sede, ha subito un gravissimo furto di manoscritti e di opere a stampa antiche durante la primavera del 1985. Tra i manoscritti rubati vi è anche il ms Landi 120 (non 20) contenente la Retorica ad Erennio di Cicerone…’. The MS was still unrecovered 5/3/1987)

Ad Her

[Ad Her] mi-gl

**Piacenza**

# Biblioteca Comunale Passerini-Landi

# 172 xiv

Ad Her

[Ad Her] s-gl (‘rare glosse interlineari e marginali di mani diverse’ - letter from the Director, Dott. Carlo Emanuele Manfredi dated 21/8/1986)

**Schlägl (Plagensis; Austria)**

# Poppi

**Biblioteca Comunale Rilliana**

**24 xv**

De inv E

[De inv E ] s-gl

**Prag: see Praha**

**Prague: see Praha**

**Praha**

**Knihovna Metrolitní Kapituli (Archivní Spravá MV CSR)**

**1308 (L.LXIII) xv (1465)**

De inv

[De inv] s-gl (to I only)

Ad Her

[Ad Her] mi/s-gl (citing Alanus a number of times)

**Praha**

**Knihovna Metrolitní Kapituli (Archivní Spravá MV CSR)**

**1472 (M.CXII) xiv (1358)**

De inv

[De inv] mi/s-gl

Ad Her

[Ad Her] mi/s-gl

**Praha**

**Knihovna Metrolitní Kapituli (Archivní Spravá MV CSR)**

**1473 (M.CXIII) xv (1580-82)**

[Ad Her] comm E (Magister Hieronymus)

**Praha**

**Národní Knihovna Ceské Republiky (formerly Universitní Knihovna; given in MO I pp.281-82 as ‘Statní Knihovna)**

**IV.E.10 (690)-I xii-xiii** (MO I p.281)

Ad Her

[Ad Her] mi-gl (‘Tullius de V partibus proposuit tractatum …’ cf. MS York XVI.M.7, Ad Her gloss by William of Champeaux [?])

**Praha**

**Národní Knihovna Ceské Republiky (formerly Universitní Knihovna; given in MO I pp.281-82 as ‘Statní Knihovna)**

**V.G.12 (964) xv**

Ad Her

**Praha**

**Národní Knihovna Ceské Republiky (formerly Universitní Knihovna; given in MO I pp.281-82 as ‘Statní Knihovna)**

**VIII.C.13 (1482) xv**

Ad Her E

**Praha**

**Národní Knihovna Ceské Republiky (formerly Universitní Knihovna; given in MO I pp.281-82 as ‘Statní Knihovna)**

**VIII.H.3 (1621) xv**

De inv

Ad Her

**Praha**

**Národní Knihovna Ceské Republiky (formerly Universitní Knihovna; given in MO I pp.281-82 as ‘Statní Knihovna)**

**VIII.H.16 (1634) xii-xiii**

De inv (MO I ##410 and 413a)

[De inv] mi-gl

**Praha**

**Národní Knihovna Ceské Republiky (formerly Universitní Knihovna; given in MO I pp.281-82 as ‘Statní Knihovna)**

**VIII.H.33 (1651) xv (1462)**

De inv

[De inv] m-gl (Thierry of Chartres, abr)

[De inv] s-gl

Ad Her

[Ad Her] s-gl

**Princeton**

**University Library**

**Kane 29 xiv** (1350?; Grenville Kane Collection, formerly in Tuxedo Park; Ullmann ‘Latin manuscripts in American Libraries’ *Philological Quarterly* 5 [1926] p.153: ‘probably written in Bologna about 1300’)

Ad Her

**Princeton**

**University Library**

**Garrett 111 xiv (1400? Robert Garrett Collection)**

Ad Her

[Ad Her] mi/s-gl (as with so many glossed texts, heavy only on the early folios)

**Ravenna**

**Biblioteca Classense**

**111 xv (1469)** (IRHT; Mazzatinti 4 p.167)

Ad Her

**Ravenna**

**Biblioteca Classense**

**204 xv (1468)** (IRHT; Mazzatinti 4 pp.192-93)

Ad Her

**Ravenna**

**Biblioteca Classense**

**261 xii (MO I p.282)**

De inv

[De inv] s-gl (**xiii-xv**)

Ad Her

[Ad Her] s-gl (**xiii-xv**)

**Ravenna**

**Biblioteca Classense**

**371 xv** (IRHT; Mazzatinti 4 p.225)

De inv

**Redlynch House (near Salisbury, Great Britain: Library of Major James Abbey;** POKk p.553: ‘After the death of Major Abbey, his mss. were sold at Sotheby’s in 1970-78’)

**JA 3208 xv (1475-90)** (Present whereabouts unknown: letter from Ms Tilly de la Mare 23/10/1980; sold Sotheby sale 25/3/1975 lot 2965 and again 22 June, 1982 lot 56)

Ad Her

[Ad Her] s-gl

**Reggio Emilia**

**Biblioteca Municipale ‘A.Panizzi’**

**Turri E 9 xv (1460)**

Ad Her

[Ad Her] s-gl (letter from Dott. Maurizio Festanti, Director, 9-08-86: ‘con postille interlineari e marginali’)

**Reggio Emilia**

**Biblioteca Municipale ‘A.Panizzi’**

Vari B 26 xvi

[Ad Her] cn (? ‘Lod. Castelvetro, sopra la Rettorica Ad Her; autograph; POK *Iter* VI; G.Frasso in *Aevum* 65 [1991])

**Reims**

**Bibliothèque Muncipale (Publique)**

**1107 xv**

Ad Her

**Reims**

**Bibliothèque Municipale (Publique)**

**1108 xv (1411-16)**

Ad Her

**Rheims: see Rheims**

**Rome**

**Biblioteca Angelica**

**18 (A.3.26) xv**

Ad Her

[Ad Her] s-gl

**Rome**

**Biblioteca Angelica**

**186 (B.7.15) xv**

Ad Her tca (‘the whole is a clearly set out formal text and gloss, well written in a late medieval Gothica *littera textualis’* – JOW nn on site; m-gl cites ‘Gaulfredus in poetria’, Aristotle ‘in primo Topicorum’, ut dicit Seneca in quarto ubi Phedra Philocapta … Ypolitus…’)

[Ad Her] comm tca

[Ad Her] s-gl (scribal)

**Rome**

**Biblioteca Angelica**

**234 (C.3.15) xv**

Ad Her E

**Rome**

**Biblioteca Angelica**

**1310 (T.3.1) xv**

**Ad Her**

[Ad Her] m-gl E (inc. ‘Rhetorica est in civilibus causis persuadendi dissuadendique scuientia qua iudicis animus demolitur, qua furor hosticus delinitur, qua rustica purpuratur oratio et qua gloria nascitur …’; fol.39r: ‘ego, Octavianus Martinus de Suessa incepti audire Tullii novam Rethoricam sub anno … [on Oct. 6th, 1401]; it is difficult to tell from the mfm to what extent the glosses are from the hand of Octavianus Martinus de Suessa but they may be. Presumably Martinus, if the glosses are his, is transcribing the lectures of his master, who is not at present known)

[Ad Her] s-gl (a second, humanist glossing hand)

**Rome**

**Biblioteca Boncompagni** (? Narducci *Cat. ora poss. Da D.Baldassare Boncompagni* , POKk p.177 Rome 1862 pp.165-66 and Rome 1892 pp.204-06)

**349 (357) xv**

Ad Her

[Ad Her] s-gl (‘I testi sono per lo più accompagnati da glose marginali’ – Narducci)

**Rome**

**Biblioteca Casanatense**

**90 (C.IV.6) xv**

Ad Her

[Ad Her] s-gl (esp. on early folios)

**Rome**

**Biblioteca Casanatense**

**543 (F.IV.29; N.IV.III in CC Supri. Vol.440 MSS in CC Supri) ) xiv-xv**

[Ad Her] comm (‘In authoris ad Herennium libros quattuor: tres sunt inscriptionis …)

**Rome**

**Biblioteca Casanatense**

**1271 (C.III.27) xvi (xv?)**

Ad Her (humanist script)

[Ad Her] s-gl

**Rome**

**Biblioteca Casanatense**

**1912 (A.I.15) xv**

Ad Her

[Ad Her] s-gl

De inv

**Rome**

**Biblioteca Corsiniana (now Accademia Nazionale dei Lincei, Biblioteca)**

**67 (44.D.11) xiv**

[Ad Her] trans/para ital* (Guidotto dabologna; Speroni [1994] CVI)

[Ad Her] exord ital*

**Rome**

**Biblioteca Corsiniana**

**97 (43.F.30) xv**

Ad Her

**Rome**

**Biblioteca Corsiniana**

**139 (43.E.31) xv**

Ad Her

[Ad Her] s-gl

**Rome**

**Biblioteca Corsiniana**

**194 (43.E.39) xv**

De inv incompl

[De inv incompl] s-gl

[De inv] acc (? Fols 54-57v, a fragmentary fascicule of a ‘trattato-retorico-grammaticale’ probably in a different hand from the rest of the vol)

**Rome**

**Biblioteca Corsiniana**

**285 (43.E.45) xvi-xvii**

[De inv] acc (‘M.Tullii Ciceronis in librum de inventione ad verba ‘saepe et multum’…)

**Rome**

**Biblioteca Corsiniana**

**376 (43.G.30) xiv** (‘scrittura minuscula cancelleresca di mano unica’)

Ad Her

[Ad Her] mi/s-gl

**Rome**

**Biblioteca Corsiniana**

**1832 (43.E.4) xv**

De inv extr (? POK Iter 2 p.112)

**Rome**

**Biblioteca Nazionale Centrale (Vittorio Emanuele II)**

**Vitt.Em. 1630 xi-xii** (listed in MO I pp.172-73 as Biblioteca del Conte Baldeschi-Balleani 5; according to ‘una fotocopia della descrizione del manoscritto effettuata per il nostro inventario da M.M.Breccia Fratadocchi, e pubblicato nei nostri “BE Quaderni” ‘ very kindly made available to me by the Director, Dott. Paolo Veneziani [in a letter dated 26-9-1996], the manuscript belonged, with the signature L.II.12, to the library of the Baldeschi Balleani family of Iesi (and Florence) ‘in cui era confluita nel 1793 per eredità dalla famiglia del conte Aurelio Guarnieri di Osimo la collezione di manoscritti raccolta nel XV secolo dagli umanisti Stefano e Francesco Guarnieri, della quale questo codice faceva presumibilmente parte’. The MS was acquired by the Biblioteca Nazionale Centrale in 1994; see *Settimane di Studio* 22 [1975] 404; Spallone RHT 27 [1997] -09-49. The De inv is copied in Beneventan, of the Bari type. I owe notice of the acquisition of this MS by the BNC, Rome, to the kindness of my colleague Ms Frances Muecke)

De inv

[De inv] s-gl (contemporary but not scribal? ‘Numerose sono le glosse marginali e interlineari coeve in inchiostro nero e rosso. Le glosse marginali sono frequentemente disposte in uno schema a diagramma. Ulteriori note marginali di altra mano e più tarde [xv sec.] sono presenti nella seconda parte del codice…’)

Ad Her

[Ad Her] s-gl (more hh of different dates; cf comment on [De inv] s-gl)

**Roma**

**Biblioteca Vallicelliana**

**B 48 xv**

Ad Her

[Ad Her] s-gl

**Roma**

**Biblioteca Vallicelliana**

**E 57 xiii** (MS has been missing since at least 1810)

[De inv] comm (Victorinus; 72 fols)

**Rouen**

**Bibliothèque Municipale**

**39 xiii**

Ad Her extr

[Ad Her] ex E (Marbod)

**Rovereto**

**Biblioteca Civica**

**6 xv**

Ad Her

[Ad Her] s-gl

**Rovigo**

**Biblioteca comunale (Biblioteca dell’Accademia dei Concordi)**

**243 (8,2,31) xv**

Ad Her

[De inv] comm E (‘si tam agentis…’)

**Saint Omer**

**Bibliothèque Municipale**

**115 xii**

Ad Her extr

[Ad Her] ex E (Marbod)

**Saint Omer**

**Bibliothèque Municipale**

**680 xv**

Ad Her

De inv

[De inv] mi/s-gl

**Saint Petersburg (Leningrad)**

**Publichnaia biblioteka im. M.E.Saltykova Schedrina**

**Cl.Lat. F .v.17 auct,class.lat. xv (1425)**

De inv

Ad Her

**Saint Petersburg (Leningrad)**

**Publichnaia biblioteka im. M.E.Saltykova Schedrina (the former Imperial Library, wrongly referred to as the ‘Hermitage Library’)**

**Cl.Lat. F.v.N 8 ix-x**

Ad Her

[Ad Her] mi-gl (partly in Tironian notes; status from its early date)

[De inv] comm extr (Victorinus)

De inv

[De inv] s-gl

**Saint Petersburg (Leningrad)**

**Publichnaia biblioteka im. M.E.Saltykova Schedrina**

**Cl.Lat. Q.v.N 4 xii**

De inv

Ad Her

**Saint Petersburg (Leningrad)**

**Biblioteka Rossiiskoi Akademii Nauk (formerly Biblioteka Akademii Nauk SSSR)**

**O. No.1 (XXAb/1a) xii**

De inv

Ad Her

**Salamanca**

**Biblioteca Universitaria**

**2306 same no.as next? Is this a mistyping or do the two really have the same no? both entered up, this one as ‘87’**

**87 xiii**

De inv

[De inv] s-gl (‘many marginal notes in different hands and epochs’)

Ad Her (final few lines added by a later hand)

[Ad Her] s-gl (‘many marginal notes in different hands and epochs’)

**Salamanca**

**Biblioteca Universitaria**

**2306 (formerly Madrid Realbibl 2.J.3, VII B 2 and 191) xiv-xv**

De inv extr

Ad Her extr (a florilegium)

**San Daniele del Friuli**

**Biblioteca Civica Guarneriana** (see refs cited at POKk p.768)

**107 xv**

[Ad Her ] inaug (? ‘oratio de rethorica’)

**San Daniele del Friuli**

**Biblioteca Civica Guarneriana**

**140 xv**

[Ad Her E] exord (Barzizza)

**San Daniele del Friuli**

**Biblioteca Civica Guarneriana**

**141 xv**

[Ad Her E] exord (Barzizza)

**San Daniele del Friuli**

**Biblioteca Civica Guarneriana**

**228 xv**

[Ad Her E] exord (Barzizza)

[Ad Her E] exord (‘exordia edita per magistrum Johannem de Spiginbergo)

**San Gimignano**

**Biblioteca Comunale**

**24 (formerly A.II.21) xiv**

[Ad Her] comm E (on Ad Her 1.1.1-4.29.40, inc. ‘plena et perfecta locutio triplici comparare [= comparatur?]…/ [*etsi in negociis*] tunc more aliorum auctorum premittit auctor….’)

**San Gimignano**

**Biblioteca Comunale**

**27 xv**

[Ad Her E] exord (Barzizza)

[Ad Her] comm E (on Ad Her to 1.14: ‘circa hunc librum Tullii hec consideranda sunt: materia auctoris, itentio libri, utilitas…’; ‘an extremely cursory work, except, perhaps, on the introduction. Has no precise beginning (*etsi* etc), discussion of proem fades imperceptibly into discussion of *negociis* and the three philosophies; offers only the briefest notes on some of the main points of the classical text. More likely to be notes on the text begun and never brought far, than a fragment from a pre-existing commentary. As such, no other traces of the text are likely to be met with. One of a number of bits and pieces tacked on to the end of more substantial rhetorical and grammatical items. Many hh, apparently, have made up the volume’; date 1409? JOW nn on site)

[Ad Her] inaug (Guarino da Verona)

**Sankt Florian (Austria)**

**Stiftsbibliothek**

**XI 579 xv** (‘Beide Texte haben Randbemerkungen und eingefügte Blätter kleineren Formates mit mehr oder weniger Text’ – letter from Prof. Dr Dr Karl Rehberger, Stiftsbibliothekar 12-12-1986; along the bottom margin of fol.35v we find: ‘correctus est liber iste usque ad finem a principio a magistro Andrea Wall de Baltzaim, anno domini 1454, cooperante Hainrico Nithart de Ulma in studio Papiensi in quo tunc floruit Alamanorum nacio, nam tres marchiones de Niderbaden in eodem studio tunc studuerunt: Joannes Georius et Marcus, fraters, et quidam Bavarie Iohannes filius … et dominus Ortlieb de Brandis, dominus meus Otto Dappifferi filius dominus Eberhardi, dominus Altarbertus de Ibis, quidam nobilis Gotzfeld Georius Hasl de Herbipoli tunc juristarum rector et frater suus Iohannes et alii multi qui tunc omnes operam legum atque canonum studio impendebat …’ – Czerny POKk p.771)

Ad Her

[Ad Her] s-gl

De inv

[De inv] s-gl

**Sankt Gallen**

**Stadbibliothek (Vadianische bibliothek)**

**313 x** (with Quintilian and Boethius rhet. extracts; rhe MS has been incorrecttly labelled ‘Vadianus’ but although it is now kept in the Vadianische bibliothek, it formed no part of the original Vadiana bequest)

De inv

[De inv] s-gl (**x-xi**)

Ad Her

[Ad Her] s-gl (MO I p.284: ‘gloses interlinéaires et marginales, surtout pour *rhet. Her;* ‘the Ad Her has more glosses than the De inv, some tables and marginal headings. There are no glosses of any length, but, taken together they all betoken considerable study of the text by a number of students, including the scribe’ JOW nn on site*’*)

**Sankt Gallen**

**Stiftsbibliothek**

**820 x** (see Sonderegger ‘Die Frage nach Notkers des Deutschen Ausgangspunkt’)

De inv (with a lacuna supplied at the end)

[De inv] s-gl (MO I p.285-86: ‘Nombreuses gloses interlinéaires et marginales s. xi et xii (peut-être de la main de Ekkehard IV [died] 1060; quelques gloses allemand aux p.136-37’; also JOW on site: ‘just a few glosses, interlinear and marginal; words, phrases, tables etc; very few of any length’; ‘The text of the De inv. is glossed, apparently in a near contemporary hand. Bk I contains mostly headings [and a few German translations], but they are of a rather detailed type. Bk II contains some longer notes [e.g. pp.134, 138, 143, 148; Chatelain (see Mattmann) provides a facsimile and transcription of the glosses on p.134], revealing an interest in the legal suits Cicero discusses under the headings of *constitutio generalis*, *translativa* and the *controversiae in ratione an in scripto*. The gloss is heavily dependent upon Victorinus and may be placed alongside MSS Paris BN lat. 7696, 7748, 7774A and the far more extensive glosses in MS Leiden Q.33 and Oxford Laud. Lat. 49, as far as scope and interest are concerned. Contemporary motivation for the study of the *controversiae* is hinted at [e.g. p.134 ‘verbi gratia non liceat laico sacerdotes impetere nisi in propria; in libro Ad Herennium sic habetur…’, a reference to Ad Her 1.12.22 follows with some discussion])

**Sankt Gallen**

**Stiftsbibliothek**

**851 xv**

[Ad Her] comm (Guarino da Verona)

[Ad Her E] exord (Barzizza)

**Sankt Gallen**

**Stiftsbibliothek**

**852 xii (MO I p.286**

De inv

[De inv] s-gl (**xii-xiii**)

Ad Her

[Ad Her] (**xii-xiii**)

**Sankt Paul im Lavanttal (Austria)**

**Stiftsbibliothek**

**Codices Hospitalenses Chartacei 137/4 (formerly 28.2.1 and 28.d.137) xv**

[Ad Her] comm (Bartolinus ‘Justinianus Christianissimus…’)

[Ad Her E] exord (Barzizza)

**Saragossa: see Zaragoza**

**Savignano sul Rubicone (di Romagna)**

**Biblioteca dell’Accademia Rubiconia dei Filopatridi**

**5 xiv**

De inv

[De inv] s-gl (? MS destroyed in the war)

Ad Her

[Ad Her] s-gl (? MS destroyed in the war)

**Savignano sul Rubicone (di Romagna)**

**Biblioteca dell’Accademia Rubiconia dei Filopatridi**

**8 xv**

Ad Her

[Ad Her] m/mi-gl (‘on the first book the glosses completely fill the very large margins; on the second book they are still considerable; on the third and fourth books they average about four comments per page; there are also some interlinear glosses’ LSD for JOW on site; Mazzatinti ‘con molte note marginali e interlineari, specialmente nella prima metà’; also letter from Dott. Luigi Ughi, Bibliotecario, 10-10-1986, with facsimiles, confirming this)

**Savignano sul Rubicone (di Romagna)**

**Biblioteca dell’Accademia Rubiconia dei Filopatridi**

**45 xiii-xiv**

[Ad Her] ex E (Marbod)

**Schlägl (Plagensis; Austria)**

**Prämonstratenser-Stiftsbibliothek**

**124 (454 b.51) xv**

[Ad Her] comm (Guarino da Verona)

**Schlägl (Plagensis; Austria)**

**Prämonstratenser-Stiftsbibliothek**

**131 (454 b.54) xv**

**Ad Her** (explicit ‘laus Deo pax vivis requiesque defunctis. Explicit perutile et breve compendium artis rhetorice nove Marci Tulii Ciceronis ad Herennium per me fratrem Guilelmum Savonensem de Traversagnis ordinis minorum provincie Janue tunc tempore in Castro Montis Silicis commorantem anno magni Jubilei …. 1450 3a Decembrios in die Iovis hora 3a noctis vel circa… Henricus Moringher iuris canonici scolaris Bononiensis haec calamo patravit cuius legens benivole recordetur’ [Henricus Moringher the second of the two hh in the MS]; MS contains a papl bull against the Turks, dated 1455 and the Acts of a Diet at Ratisbon 1454…)

**Schlettstadt: see Sélestat (France)**

**Schloss Harburg: see under ‘Augsburg’ and ‘H’**

**Sélestat (Schlettstadt, France)**

**Bibliothèque Humaniste (formerly Municipale)**

**443 x**

[De inv] Victorinus E (MO I pp.328-29)

**Sevilla**

**Bibliotecar Capitular y Colombina (MO I p.287: Biblioteca Colombina)**

**5-4-13 xv**

[Ad Her] comm (‘lectura Marci Tulii super libro Rhetoricorum’ / ‘in minimis etiam desuper petendum est auxilii Plato etc…. primo habemus querere causas…’ / ‘dividitur enim liber iste principali divisione, in prohemium et tractatum’ / (*etsi negociis* etc.) nota quod reperitur rhetorica esse …’, probably s.xiv)

Ad Her extr

[Ad Her] ex E (Marbod)

[Ad Her] cn

[Ad Her] ta

**Sevilla**

**Bibliotecar Capitular y Colombina**

**5-5-33 xv**

Ad Her E (POK *Iter* IV p.619b)

**Sevilla**

**Bibliotecar Capitular y Colombina**

**5-6-15 xii**

Ad Her

[De inv] comm E (‘si tam agentis…’)

**Sevilla**

**Bibliotecar Capitular y Colombina**

**7-3-10 xii-xiii**

De inv

[De inv] mi/s-gl (JOW nn on site: ‘a neat, contemporary, minor to slight gloss, somewhat sliced off at the outer side edges. On fol.1r we read ‘ut ait Grillius’ twice and the glosses reveal some study of the opening pages of Grillius’ commentary. The gloss contains many features recognisable from the s.xii tradition of commentation and draws much material [especially definitions] from Victorinus. ON 1975 (4) pp.45-47 for further extracts)

**Sevilla**

**Bibliotecar Capitular y Colombina**

**83-8-16 (formerly Z.137.34) xiv (1344)**

Ad Her

[Ad Her] m-gl (Philippus de Vicecomitibus de Pistorio ‘viridarium [elucidarium] super nova rethorica Tulliana editum et constructum a magistro Philippo de de Vicecomitibus de Pistorio notarialis facultatis [?] ac dictatorie professore ac iurista in Castro Callari [Cagliari] insule Sardinie. Sardinie MCCCXLIIII [the date given in Murphy *Ren. Eloq*. p.134 is wrong]. Incipit prohemium: m[=v?] ox [?] in summo [?] uni [?] mundano [? = viridario?] dudum residens temporisque’ / ‘solent sollempniores huius facultatis lectores referre artem dupplicem fore’ / ‘more Romano trinominum est. quidam magistri’ / ‘liber iste in duas partes dividitur principales, scilicet in prohemium et tractatum’; on Phillip see M.E.Cosenza *Biograph. and Bibliograph. Dict. of the Italian Humanists and the World of Classical Scholarship in Italy 1300-1800* [6 vols. 2nd ed., G.K.Hall, Boston 1962-67] III, 2747. This is a superb MS. The first five pages contain only the ‘gloss’, and then begins the text, in a box, two columns, 17 lines each, with a coloured miniature ‘E’ in the form of a master and his pupils, the gloss occupying in a very formal manner all margins, and taking up, basically, two columns of 68 lines each; there are a few small interlinear glosses to both text and commentary. There are fine multi-coloured initials throughout text and gloss, with rich ornament, and the gloss is arranged very often in ornamental shapes. Faulhaber (1973) pp.190-91.

**Seville: see Sevilla**

**s’Gravenhage: see same name under ‘G’.**

**Siena**

**Biblioteca Comunale degli Intronati**

**H.VI.33 xv**

[Ad Her] cn (on the *colores*)

Ad Her

[Ad Her] s-gl (at beginning) and very occasional thereafter; inc ‘i.e. occupationibus domesticis…’)

**Siena**

**Biblioteca Comunale degli Intronati**

**H.VII.6 xv**

Ad Her incompl

[Ad Her incompl] m-gl (in several hh, include scribal; inc. ‘modi docilitatis captande brevis expositio totius cause et constituere auditorem attentum modi attentionis captande promissio dicenda magna…’)

**Siena**

**Biblioteca Comunale degli Intronati**

**H.VII.43 xv**

Ad Her

**Soest, Germany**

**Wissenschaftliche Stadtbibliothek**

**24 xiii**

[De inv] comm incompl (Petrus Helias, inc. ‘sicut ordo nostre doctrine exigit ita quoque circa artem rethoricam consideranda sunt hec, primo quid sit rethorica….’; Conventus Susatensis Ord. Praedic. Dr Michael Bernd was, in 1986, preparing a catalogue of the Soest MSS. The Domincan Library of the town was very important in the 13th and 14th centuries, he told me, but the part that was at Münster was destroyed in WWII. The Soest MSS, when I saw them, were on loan to the Staatsbibliothek Preussischer Kulturbesitz Handschriftenabteilung for cataloguing purposes. The h of fol Iv is that of brother Reynerus, a Soest Dominican of the second half of the fourteenth century, whose mark is in many of the books. On that folio our text is described as ‘item, summa una de rethorica’. Soest 24 is made up of booklets brought together from various places, perhaps Paris)

**Stockholm**

**Kungliga Biblioteket**

**Va 9 xv**

Ad Her (IRHT)

**Stockholm**

**Kungliga Biblioteket**

**Va 10 xv (1465-85)**

De inv

[De inv] m-gl (Victorinus and ‘Grillius’ [ = various medieval commentators, including Petrus Helias / Alanus]; compiler: Jean Poulain)

[De inv] s-gl (interlinear, by Jean Poulain)

[De inv] comm E (‘cum sint…’)

Ad Her

[Ad Her] m-gl (‘incipit apparatus Grillii et aliorum expositorum super secundam rethoricam Tullii’ / ‘duplicem omnium esse artium doctrinam Varronis testimonio didiscimus attestando Victorino’ / ‘(*etsi in negociis*) titulus talis est: Marci Tullii Ciceronis rethorice nove ad Herennium liber primus incipit; nova ad differentiam veteris…’ [= Alanus in early versions and Petrus Helias as in Venice 4686 and cf. other commentators such as Guarino da Verona). This entire MS is worth a major study. A very incomplete start will be found in Ward (1972ax) II no.71 pp.511-27.

**St.: see ‘Saint’ or Sankt’**

**Strasbourg**

**Bibliothèque Universitaire (Bibliothèque nationale et universitaire)**

**51 xv**

Ad Her

[Ad Her] s-gl (IRHT mfm)

**Strassburg: see Strasbourg**

**Stuttgart**

**Württembergische Landesbibliothek**

**HB VIII 13 (Weingarten K.26) xv (1469-71)**

Ad Her

[Ad Her] mi-gl (‘Tulliuas tractaturus artem rethopricam premittit quedam; prefatio dicitur prohemium…’)

De inv E

Ad Her E / de inv E

[Ad Her] exord (‘exordia super novam Ciceronis rhetoricam anno Domini 1461o Parisius collecta per egregium virum Ferrariensem nacione de ordine minorum religiosum communicata autem in Lipizk expliciunt, anno domini 1470o’ / ‘exemplum exordii in causa dubia ad captandam benivolenciam…’)

**Stuttgart**

**Württembergische Landesbibliothek**

**HB VIII 14 (Weingarten K.9) xv (1473-75)**

De inv

[De inv] s-gl

Ad Her

[Ad Her] s-gl

**Stuttgart**

**Württembergische Landesbibliothek**

**Hist. Oct. 25 xv-xvi**

Ad Her E (on memory)

**Tarragona**

**Biblioteca Provincial (Pública)**

**54 xii-xiii**

Ad Her extr (? Leotta XL ‘le definizioni in prosa sono del tutto diverse e sono posposte ai versi di tutta l’opera’)

[Ad Her] ex E (Marbod)

**Todi**

**Biblioteca Comunale**

**21 xii-xiii** (Alessio: **xii**; POK Iter VI)

De inv

Ad Her

**Toledo**

**Biblioteca del Cabildo (now Archivo y Biblioteca Capitular)**

**29-41** (Faulhaber says, CMN p.41: ‘I have no information on this MS’)

**Toledo**

**Biblioteca del Cabildo (now Archivo y Biblioteca Capitular)**

**47.15 xiii**

De inv fols 8-16v

Ad Her fols16v-25

**Toledo**

**Biblioteca del Cabildo (now Archivo y Biblioteca Capitular)**

**89.113** (Faulhaber says, CMN p.42: ‘I have no information on this MS’)

**Toledo**

**Biblioteca del Cabildo (now Archivo y Biblioteca Capitular)**

**100.11 xv (1455)**

De inv

Ad Her

**Toledo**

**Biblioteca del Cabildo (now Archivo y Biblioteca Capitular)**

**100.12 xv**

Ad Her

[Ad Her] s-gl

**Toledo**

**Biblioteca del Cabildo (now Archivo y Biblioteca Capitular)**

**100.13 xv (1463)**

Ad Her

[Ad Her] s-gl

**Toledo**

**Biblioteca del Cabildo (now Archivo y Biblioteca Capitular)**

**100.42 xv**

[Ad Her] inaug (Guarino da Verona)

**Toledo**

**Biblioteca del Cabildo (now Archivo y Biblioteca Capitular)**

**102.6 xiii**

Ad Her

[Ad Her] s-gl

**Torino**

**Biblioteca Reale (now Biblioteca ex-Reale, formerly ‘del Re’)**

**Varia 69 xiv**

Ad Her

[Ad Her] s-gl (various hh)

**Torino**

**Biblioteca Reale (now Biblioteca ex-Reale, formerly ‘del Re’)**

**Varia 75 xv**

[Ad Her] comm (inc. ‘coniunctio convenientius cum subiunctivi modi verbo iungitur. Ci(cero) rhetorica nova: *Etsi negotiis familiaribus*: quamquam vero saepius cum indicativo iungitur; Virgilius secundo Eneidos ‘quamquam animus meminisse horret…’ [Aen. 2.12]; a unique, superb, humanist text, every page surrounded completely by large multi-colour and gold borders containing crowns, busts of Sforza princesses, dukes and other personnages, coats of arms, flowers, heraldic items, purses, keys, armies, jousts and battles, cities, landscapes, naval scenes, scholars / magistri at desks etc. Fol. 8v: ‘pedagogus qui docet puerum ire et inclinare se maioribus….Ludovicus Maria Sfortia vicecomes annorum XVm et mensium IIIIor manu propria die XXVII Novembris 1467’. Filelfo’s name [as teacher of Ludovico??] appears in the volume and there are two portraits of him – see Luigi Firpo *Francesco Filelfo educatore e il ‘Codice Sforza’ della Biblioteca Reale di Torino* Torino 1967)

**Tortosa**

**Biblioteca del Catedral (now Archivo Capitular de Tortosa; Biblioteca de la Catedral y del Cabildo de la Santísima Iglesia Catedral)**

**80 xiii** (*florilegium*)

De in extr

Ad Her extr

**Tortosa**

**Biblioteca del Catedral (now Archivo Capitular de Tortosa; Biblioteca de la Catedral y del Cabildo de la Santísima Iglesia Catedral)**

**143 xv**

[Ad Her] para (? Fols 47-60va ‘compendium artis rethorice bonum et utile’ / ‘sincerissime ex diversis auctoribus rethorice collegi ut hiis quesitis altiora scripta huius artis gratissime apud principem eloquentie Tullium nobis apercius elucescant’ / ‘rethorica dicitur a rosis [= resis] gratia quod et ornatius latine…’)

**Tours**

**Bibliothèque Municipale**

**890+ xii**

Ad Her extr

[Ad Her] ex E (Marbod; see Leotta XL-XLI on the probable contents of the MS here)

**Trento**

**Biblioteca Comunale**

**1663 xv**

Ad Her (IRHT; Gallick 93)

**Treves: see Trier**

**Treviso**

**Biblioteca Capitolare**

**I/177 xvi** (? So according to a letter 3/9/1986 from Mons. Angelo Campagner, Direttore, but looks to me like a standard humanist **xv** script)

[Ad Her E] exord (Barzizza; not ‘Guarino Guarini, as advised in a letter 3/9/1986 from Mons. Angelo Campagner, Direttore; see fol.43v for Barzizza’s authorship)

**Trier**

**Bistumsarchiv (Bischöfliches Archiv; until 1936 Dombibliothek)**

**18-III xi-xii** (MO III.2 p.49: xiiex)

[De inv] comm (Menegaldus ‘Quam Greci vocant retoricam latini dicunt artificiosam eloquentiam…’ – full version; the apparent ‘lacuna’ fols 90v-91r does not betoken much loss of text)

[Ad Her] comm E (Menegaldus, ‘*Etsi*: Herennius amicus erat…’; with a lacuna from Ad Her 3.9.16 to 4.20.27). See now on this MS Bognini (2016).

**Trier**

**Stadtbibliothek**

**1081 (29)-II xii**

Ad Her

[Ad Her] s-gl (MO I p.2898 ‘Quelques gloses interlinéaires et marginales’)

**Trier**

**Stadtbibliothek**

**1082 (32)-IV xii (MO I p.329 ‘xi’**

[Ad Her] comm E (Odalricus / Odelricus of Rheims: ‘hunc librum scripsit Tulius rogatu amici sui Herennii et facit in eo perfectum tractatum rethorice artis’ / ‘prius in hoc prologo que potest dici prologus ante rem excusationem premittat dicens se inpeditum fuisse et aliorum amicorum negotiis…’)

[De inv] comm E (Victorinus, from De inv 1.40.74 [Halm RLM 247.27] to end)

**Turin: see Torino**

**Uppsala**

**Universitetsbibliothek (Carolina)**

**C 904 xv-xvi (early xvi)**

Ad Her

**Uppsala**

**Universitetsbibliothek (Carolina)**

**C 921 (Auct. Lat. 22) xii**

[De inv] acc (‘incipit ars rethorice, i.e. preceptio oratoria que informat …’)

De inv

[De inv] mi-gl

[De inv] s-gl (**xiii-xv**)

Ad Her incompl

[Ad Her incompl] s-gl (**xii-xv**)

Ad Her E (xiv, to fill up the twelfth-century text)

**Uppsala**

**Universitetsbibliothek (Carolina)**

**C 928-II xii**

De inv

[De inv] mi-gl

[De inv] s-gl (**xiii-xv**)

Ad Her

[Ad Her] mi-gl

[Ad Her] s-gl (**xiii-xv**)

**Uppsala**

**Universitetsbibliothek (Carolina)**

**C 928-III xiii**

[Ad Her] comm E (on Ad Her 2.3.5 to end; an early version of the ‘Alanus’ gloss [actually = Petrus Helias, Venice Marc. Lat.4686] ‘*extrahit [=’extra id’] crimen*, i.e. extra crimen imprudentie vel stultitie vel aliorum que dicta sunt …’)

**Uppsala**

**Universitetsbibliothek (Carolina)**

**C 930 xiv**

[De inv / Ad Her] cn (‘sepe et multum hoc mecum cogitavi etc. … Quintilianus: civitas est collectio hominum …’) fols 131ar-bv

**Urbana**

**University of Illinois Library (Library and Museums of the University of Illinois)**

**58 (808 op7 14-) xv**

Ad Her E

**Utrecht**

**Bibliotheek der Rijksuniversiteit**

**812 (lat.6) xv**

Ad Her

**Vatican City: see Vaticano, Città del**

**Vaticano, Città del**

**Biblioteca Apostolica Vaticana**

**Barb.lat. 20 (VIII,20) xii** (MO I p.291 splits this MS into two parts, **20-I** and **20-II**)

[Ad Her] ta (preceded by ‘Iuliani versus de Cicerone…’, ‘Palladi versus de Cicerone…’ and Asclepiadis ‘versus de Cicerone…’)

[Ad Her] cn (definitions of the figures of speech)

De inv

[De inv] s-gl (**xii-xv**)

[De inv] comm E (on De inv 1 prol ‘ut ait Quintilianus in rethoricam quamplures invehi solent …’; fol. 46v, = Oxf. CCC 250; MO I p.291)

Ad Her

[Ad Her] s-gl (**xii-xv**)

**Vaticano, Città del**

**Biblioteca Apostolica Vaticana**

**Barb.lat. 32 (VIII.32) xv**

De inv extr (fol.18v; from De inv 1.1.1 and 1.5.6)

**Vaticano, Città del**

**Biblioteca Apostolica Vaticana**

**Barb.lat. 57 (VIII.57) xv (1410)**

Ad Her

[Ad Her] s-gl

**Vaticano, Città del**

**Biblioteca Apostolica Vaticana**

**Barb.lat. 117 (VIII.117) xv**

[De inv] comm (Victorinus)

[De inv] comm E (‘Cum sint…’)

**Vaticano, Città del**

**Biblioteca Apostolica Vaticana**

**Barb.lat. 3929 (III.B.21) xv**

[Ad Her] trans/para-ital* (Giamboni / Guidotto; also contains ‘trattato di memoria artificiale’: Speroni [1994] p.LXXVIII)

**Vaticano, Città del**

**Biblioteca Apostolica Vaticana**

**Borgh. lat. 57-II xiii** (so Pellegrin I p.223; MO I p.329 gives ‘Borghese 57-II s.**xii**)

[De inv] comm incompl (‘in primis materia et intentio huius rethoris …’ / ‘(*sepe*) daturus precepta de eloquentia quia videbat eam in maximo odio …’; = William of Champeaux [?]; cf. MS York XVI.M.7)

**Vaticano, Città del**

**Biblioteca Apostolica Vaticana**

**Borgh. lat. 84 xii**

Ad Her

[Ad Her] s-gl

[Ad Her] s-gl (**xiv**)

**Vaticano, Città del**

**Biblioteca Apostolica Vaticana**

**Borgh. lat. 326-III xii-xiii**

De inv

[De inv] s-gl

Ad Her

[Ad Her] s-gl

**Vaticano, Città del**

**Biblioteca Apostolica Vaticana**

**Chigi H.IV.91 xiv**

Ad Her incompl (to 4.52.65)

[Ad Her incompl] s-gl

**Vaticano, Città del**

**Biblioteca Apostolica Vaticana**

**Chigi H.IV.92 xv**

Ad Her

[Ad Her] s-gl

**Vaticano, Città del**

**Biblioteca Apostolica Vaticana**

**Chigi H.IV.93 xv**

[Ad Her] acc ( 8 lines only, from the gloss by Alanus: ‘omnium artium doctrinam duplicem esse secundum preceptum sententiamque Varronis Victorino teste…’)

Ad Her

[Ad Her] s-gl

**Vaticano, Città del**

**Biblioteca Apostolica Vaticana**

**Chigi H.IV.94 xv**

Ad Her

[Glossed? Pellegrin gives no information, p.305]

**Vaticano, Città del**

**Biblioteca Apostolica Vaticana**

**Chigi H.V.142 xv**

[Ad Her] acc (‘Priscianus de arte oratoria …’)

Ad Her incompl (to 4.35.47, with summary of the rest at fol.90 [?])

[Ad Her incompl] s-gl (in different hand from [Ad Her] acc; inc. ‘quid est negotium? Secundum Alanum est laboriosum…’; JOW nn on site: ‘numerous glosses, especially on fols 16v-25v’; the text runs 2-89v)

**Vaticano, Città del**

**Biblioteca Apostolica Vaticana**

**Chigi H.V.143 xiv-xv**

Ad Her

[Ad Her] s-gl

**Vaticano, Città del**

**Biblioteca Apostolica Vaticana**

**Chigi H.V.144 xii** (with fols 24-25, 34-35, 40-43, 48-49 **xiii**; MO I p.292)

De inv incompl

[De inv incompl] mi/s-gl (**xii-xiii**)

[De inv incompl] s-gl (**xii-xv** after fol.5, except for tables of divisions of rhetoric f.41v; the De inv is fols 1-41v)

Ad Her extr (between 1.9.16 and 2.13.19 – see Pellegrin I p.304)

[Ad Her extr] mi-gl (**xiii**)

**Vaticano, Città del**

**Biblioteca Apostolica Vaticana**

**Chigi H.V.145 xv**

Ad Her

**Vaticano, Città del**

**Biblioteca Apostolica Vaticana**

**Chigi H.VI.179 xi-xii** (fols 9v-43v; **xv** fols 3-8, 92; see Pellegrin I p.331)

De inv incompl

[De inv incompl] s-gl

[De inv] comm E (Grillius)

Ad Her

[Ad Her] s-gl

[Ad Her] ta

**Vaticano, Città del**

**Biblioteca Apostolica Vaticana**

**Chigi H.VIII.291 xv (1417)**

[Ad Her (/ De inv)] comm incompl (Luigi de’ Gianfigliazzi – Luigius de Gianfilliaciis de Florentia, ‘incipit summa dictaminum retorice ex arte veteri et nova collecta per me Luigium …’ / de quibusdam extrinsecis sive generalibus ad totam retoricam …’ / ‘de his vide quod habes in primo veteris post proemium …’ / ‘Marci Tullii Ciceronis ad Gaium Herennium retoricorum liber primus incipit …’ / ‘in hoc libro titulo omne de quibus supradictum est …’)

[De inv] comm (Victorinus)

[De inv ] comm E (‘cum sint …’)

**Vaticano, Città del**

**Biblioteca Apostolica Vaticana**

**Chigi L.VII.249 xv [?]**

[De inv]trans/para ital* (Brunetto Latini)

**Vaticano, Città del**

**Biblioteca Apostolica Vaticana**

**Ottob. lat. 1036 xiv**

Ad Her

[Ad Her] s-gl ([*etsi negotiis*] dividitur iste liber principaliter in tres partes …’ / ‘orator est vir bonus dicendi peritus: vir bonus consistit natura, moribus …’ [= Isid. Et. II.3])

**Vaticano, Città del**

**Biblioteca Apostolica Vaticana**

**Ottob. lat. 1182 xv**

[Ad Her] cn (‘primo id ipsum quod dicit otii libentius et captat benivolentiam a persona …’, fols 2-10v)

De inv

[De inv] comm E (‘si tam agentis …’; follows De inv without a break of more than a line, and at the end: ‘Marci Tullii Ciceronis prima rethorica explicit. Incipit secunda ad Herennium, incipit prologus …’; yet the volume contains no Ad Her, as Pellegrin confirms, I p.465)

**Vaticano, Città del**

**Biblioteca Apostolica Vaticana**

**Ottob. lat. 1190 xii** (Pellegrin I p.470 and MO I p. 293 give fol.66v as containing, within Roman architectural decor, a figure of Rhetoric offering Cicero a book, with appropriate verses, and fol.68v as containing the musician Orpheus, charming creation, with appropriate verses)

De inv

[Ad Her] ta (following Cass. *De rhetorica* with tables of the parts of rhetoric)

Ad Her

**Vaticano, Città del**

**Biblioteca Apostolica Vaticana**

**Ottob. lat. 1191 xiv**

Ad Her

**Vaticano, Città del**

**Biblioteca Apostolica Vaticana**

**Ottob. lat. 1224 xv (1436)**

[Ad Her] comm (Bartolinus ‘Justinianus Christianissimus…’)

**Vaticano, Città del**

**Biblioteca Apostolica Vaticana**

**Ottob. lat. 1259 xv**

[De inv] acc (? Pellegrin I p.505 ‘un bref sommaire du contenu’ [of the De inv])

De inv

Ad Her

**Vaticano, Città del**

**Biblioteca Apostolica Vaticana**

**Ottob. lat. 1438 xv (1433)**

[Ad Her] comm (Bartolinus; fol.77v: ‘explicit rescriptum Tullii Marci Ciceronis secundum magistrum Bartholinum et cetera. Comentum explicit sive rescriptum nove recthorice Tulii secundum elegantem magistrum Bartholinum de Bononia scriptum ibidem per me Petrum de Damiano tunc in recthorica studientem sub magistro Gasparrino de Pergamo [Barzizza] oratore insigni. Redactum editumque in hoc breve per abbatem Jacobum de Porffidis de Ariano Beneventanum canonicum’ / inc ‘Iustinianus Christianissimus imperator dicit in nomine …’ / ‘[*etsi in negotiis familiaribus*] discussis his tribus que iuxta literam solent queri…’)

[Ad Her] comm E (fol.106vb: ‘explicit rescriptum tercii et quarti libri rethoricorum Tullii finitum per me Lucam Molegnyanum de Folgia’, but in fact = Bartolinus somewhat re-arranged [see Wertis Viator 10 (1979) 301], inc. ‘triplicem partem philosophie ethice si moralis yconomico etc.’)

[Ad Her E] comm (Barzizza, on Ad Her 4.19-68: ‘cum semper exornationes verborum atque sententiarum omnibus conveniat [= conveniant] partibus orationis …’)

[Ad Her E] ex (Marbod)

**Vaticano, Città del**

**Biblioteca Apostolica Vaticana**

**Ottob. lat. 1449 xv**

De inv

Ad Her

**Vaticano, Città del**

**Biblioteca Apostolica Vaticana**

**Ottob. lat. 1453 xv**

Ad Her extr (from bk 4)

**Vaticano, Città del**

**Biblioteca Apostolica Vaticana**

**Ottob. lat. 1584 xiv**

Ad Her

[Ad Her] s-gl

**Vaticano, Città del**

**Biblioteca Apostolica Vaticana**

# Ottob. lat. 1633 xv

Ad Her

**Vaticano, Città del**

**Biblioteca Apostolica Vaticana**

**Ottob. lat. 1858 xv (1462)**

Ad Her

[Ad Her] s-gl

**Vaticano, Città del**

**Biblioteca Apostolica Vaticana**

**Ottob. lat. 1864 xii** (**xv** fols 45-46, xii-xiii fols 103v-104v; Pellegrin I p.694; MO I p.294; III.2 p.44)

De inv

[De inv] s-gl

[De inv] s-gl (**xiii-xv**)

Ad Her

[Ad Her] s-gl

[Ad Her] s-gl (**xiii-xv**)

**Vaticano, Città del**

**Biblioteca Apostolica Vaticana**

**Ottob. lat. 1983 xv**

Ad Her incompl

**Vaticano, Città del**

**Biblioteca Apostolica Vaticana**

**Ottob. lat. 1990 xiv-xv**

Ad Her

[Ad Her] s-gl

**Vaticano, Città del**

**Biblioteca Apostolica Vaticana**

# Ottob. lat. 2988 xv

Ad Her E (fols 127-129v on Ad Her 1.6.9)

**Vaticano, Città del**

**Biblioteca Apostolica Vaticana**

**Ottob. lat. 2993 xiv (1357)**

[De inv] comm (Petrus Helias ‘sicut ordo nostre doctrine exigit ita quoque circa artem rethoricam…’ / ‘est igitur intencio Tulii in hoc prohemio persuadere studendum esse arti rethorice defendendo artem rethoricam contra invidos et eam commendando …’; f.58r: ‘expliciunt rationes Petri Elie super libros rethoricorum veterum Tulii’)

**Vaticano, Città del**

**Biblioteca Apostolica Vaticana**

**Ottob. lat. 3331 xv**

[De inv] comm (Victorinus)

[De inv] comm E (‘cum sint…’)
